# Supplementary material
Source: PubMed Central journal article supplement (PMC5652590)
Supplement: DC171185SupplementaryData.pdf [file DC171185SupplementaryData.pdf]

SUPPLEMENTARY DATA

**Supplementary Table 1.** Unweighted ARIC Visit 1 (1987-1989) Participant Characteristics Comparing Those Who Attended Versus Did Not Attend ARIC Visit 5 (N=15,792).

|                                           | Attended ARIC<br>Visit 5<br>(n=6,538) | Did Not Attend<br>ARIC Visit 5<br>(n=9,254) | P-Value* |
|-------------------------------------------|---------------------------------------|---------------------------------------------|----------|
| Age (years), mean                         | 52.1                                  | 55.6                                        | <0.001   |
| Female, %                                 | 58.8                                  | 52.6                                        | <0.001   |
| Race/field center, %                      |                                       |                                             | <0.001   |
| Minneapolis, Minnesota whites             | 29.1                                  | 22.4                                        |          |
| Washington County, Maryland whites        | 26.8                                  | 24.0                                        |          |
| Forsyth County, North Carolina whites     | 20.3                                  | 23.8                                        |          |
| Forsyth County, North Carolina blacks     | 1.6                                   | 4.1                                         |          |
| Jackson, Mississippi blacks               | 21.7                                  | 25.0                                        |          |
| Education, %                              |                                       |                                             | <0.001   |
| < High school                             | 15.1                                  | 30.0                                        |          |
| High school, GED, or vocational school    | 41.5                                  | 40.0                                        |          |
| College, graduate, or professional school | 43.2                                  | 29.8                                        |          |
| Smoking status, %                         |                                       |                                             | <0.001   |
| Never                                     | 48.9                                  | 36.5                                        |          |
| Former                                    | 33.1                                  | 31.4                                        |          |
| Current                                   | 17.9                                  | 32.0                                        |          |
| Not reported                              | 0.1                                   | 0.1                                         |          |
| Diabetes, %                               | 6.0                                   | 16.2                                        | <0.001   |
| Hypertension, %                           | 25.3                                  | 41.9                                        | <0.001   |
| Hyperlipidemia, %                         | 22.7                                  | 28.7                                        | <0.001   |
| History of cardiovascular disease, %      | 1.9                                   | 7.1                                         | <0.001   |
| APOE ε4 Genotype, %                       |                                       |                                             | <0.001   |
| 0 APOE ε4 alleles                         | 67.9                                  | 64.9                                        |          |
| 1 or 2 APOE ε4 alleles                    | 28.0                                  | 30.6                                        |          |

\*P-value represents t-test p-value for continuous variables and chi-square p-value for categorical variables.

Abbreviations: ARIC, Atherosclerosis Risk in Communities; GED, general education development; SD, standard deviation.

SUPPLEMENTARY DATA

**Supplementary Table 2.** Unweighted ARIC Visit 5 (2011-2013) Participant Characteristics Comparing Those Included Versus Excluded From Analyses Among ARIC Visit 5 Attendees, N=6,538.

|                                           | Excluded<br>(n=4,825) | Included<br>(n=1,713) | P-Value† |
|-------------------------------------------|-----------------------|-----------------------|----------|
| Age (years), mean                         | 75.6                  | 76.3                  | <0.001   |
| Female, %                                 | 58.4                  | 59.8                  | 0.315    |
| Race/field center, %                      |                       |                       | <0.001   |
| Minneapolis, Minnesota whites             | 31.2                  | 22.5                  |          |
| Washington County, Maryland whites        | 26.9                  | 26.2                  |          |
| Forsyth County, North Carolina whites     | 19.3                  | 23.6                  |          |
| Forsyth County, North Carolina blacks     | 1.6                   | 1.6                   |          |
| Jackson, Mississippi blacks               | 20.1                  | 26.0                  |          |
| Education*, %                             |                       |                       | 0.081    |
| < High school                             | 15.7                  | 13.7                  |          |
| High school, GED, or vocational school    | 41.5                  | 41.4                  |          |
| College, graduate, or professional school | 42.6                  | 45.0                  |          |
| Smoking status, %                         |                       |                       | <0.001   |
| Never                                     | 34.8                  | 41.5                  |          |
| Former                                    | 44.5                  | 47.7                  |          |
| Current                                   | 5.8                   | 4.8                   |          |
| Not reported                              | 13.8                  | 6.0                   |          |
| Diabetes, %                               | 32.6                  | 31.0                  | 0.784    |
| HbA1c (%), mean                           | 6.0                   | 6.0                   | 0.771    |
| Hypertension, %                           | 75.0                  | 74.4                  | 0.584    |
| Hyperlipidemia, %                         | 62.8                  | 61.7                  | 0.405    |
| History of cardiovascular disease, %      | 17.2                  | 8.5                   | <0.001   |
| Atrial fibrillation, %                    | 8.2                   | 4.4                   | <0.001   |
| APOE ε4 Genotype, %                       |                       |                       | 0.845    |
| 0 APOE ε4 alleles                         | 66.8                  | 71.0                  |          |
| 1 or 2 APOE ε4 alleles                    | 27.6                  | 29.0                  |          |

\*Assessed at ARIC visit 1 (1987-1989).

†P-value represents t-test p-value for continuous variables and chi-square p-value for categorical variables.

Abbreviations: ARIC, Atherosclerosis Risk in Communities; GED, general education development; HbA1c, glycated hemoglobin; SD, standard deviation.

SUPPLEMENTARY DATA

**Supplementary Table 3.** Weighted Adjusted\* Cross-Sectional Associations of Pre-Diabetes/Undiagnosed Diabetes/Diagnosed Diabetes/HbA1c Categories with Brain MRI Parameters, ARIC Visit 5 (2011-2013), N=1713.

|                                                             | No Diabetes            | Pre-Diabetes                | Undiagnosed Diabetes     | Diagnosed Diabetes     |                             |
|-------------------------------------------------------------|------------------------|-----------------------------|--------------------------|------------------------|-----------------------------|
|                                                             | HbA1c <5.7%<br>(n=597) | HbA1c 5.7-< 6.5%<br>(n=514) | HbA1c ≥6.5%<br>(n=37)    | HbA1c <7.0%<br>(n=418) | HbA1c ≥7.0%<br>(n=147)      |
| Volumes**, β (95% CI)                                       |                        |                             |                          |                        |                             |
| Total brain volume                                          | 0 (Reference)          | 0.01 (-0.05, 0.08)          | 0.05 (-0.08, 0.19)       | -0.03 (-0.09, 0.03)    | <b>-0.20 (-0.31, -0.10)</b> |
| Frontal lobe volume                                         | 0 (Reference)          | 0.03 (-0.05, 0.11)          | 0.12 (-0.08, 0.32)       | -0.02 (-0.10, 0.06)    | <b>-0.15 (-0.26, -0.04)</b> |
| Temporal lobe volume                                        | 0 (Reference)          | 0.02 (-0.06, 0.10)          | 0.10 (-0.05, 0.25)       | 0.00 (-0.09, 0.08)     | <b>-0.16 (-0.30, -0.02)</b> |
| Occipital lobe volume                                       | 0 (Reference)          | -0.04 (-0.14, 0.06)         | -0.14 (-0.39, 0.10)      | -0.03 (-0.13, 0.07)    | <b>-0.21 (-0.35, -0.07)</b> |
| Parietal lobe volume                                        | 0 (Reference)          | 0.02 (-0.06, 0.10)          | 0.07 (-0.11, 0.26)       | -0.02 (-0.11, 0.06)    | <b>-0.16 -0.27, -0.04)</b>  |
| Deep gray matter volume                                     | 0 (Reference)          | 0.05 (-0.06, 0.16)          | -0.02 (-0.35, 0.31)      | 0.03 (-0.08, 0.13)     | <b>-0.30 (-0.44, -0.15)</b> |
| Alzheimer disease signature region volume                   | 0 (Reference)          | 0.01 (-0.07, 0.09)          | 0.07 (-0.12, 0.25)       | -0.03 (-0.12, 0.06)    | <b>-0.16 (-0.29, -0.03)</b> |
| Hippocampal volume                                          | 0 (Reference)          | 0.04 (-0.07, 0.15)          | 0.10 (-0.16, 0.35)       | -0.01 (-0.12, 0.11)    | <b>-0.22 (-0.40, -0.04)</b> |
| Markers of Subclinical Cerebrovascular Disease, OR (95% CI) |                        |                             |                          |                        |                             |
| Lobar microhemorrhages                                      | 1 (Reference)          | 1.62 (0.93, 2.80)           | 1.10 (0.30, 4.04)        | 0.90 (0.48, 1.70)      | 1.31 (0.58, 2.95)           |
| Subcortical microhemorrhages                                | 1 (Reference)          | 0.88 (0.60, 1.29)           | <b>0.34 (0.13, 0.94)</b> | 0.83 (0.55, 1.26)      | 1.07 (0.64, 1.79)           |
| Cortical Infarcts                                           | 1 (Reference)          | 1.44 (0.86, 2.41)           | 0.94 (0.26, 3.41)        | 1.03 (0.60, 1.78)      | 1.13 (0.56, 2.27)           |
| Lacunar infarcts                                            | 1 (Reference)          | 1.10 (0.74, 1.62)           | <b>0.09 (0.01, 0.69)</b> | 0.86 (0.57, 1.30)      | 1.70 (0.96, 3.02)           |
| Log <sub>2</sub> WMH volume†, β (95% CI)                    | 0 (Reference)          | 0.11 (-0.06, 0.28)          | -0.23 (-0.69, 0.22)      | 0.04 (-0.13, 0.20)     | <b>0.29 (0.05, 0.52)</b>    |

\*Model adjusted for age, sex, race/field center, education, smoking status, hypertension, cardiovascular disease, APOE ε4 genotype, and total intracranial volume (when outcome is volume).

†Standard deviation units. Definition of 1 standard deviation: total brain volume 108.1 cm<sup>3</sup>; frontal lobe volume 16.0 cm<sup>3</sup>; temporal lobe volume 11.7 cm<sup>3</sup>; occipital lobe volume 5.5 cm<sup>3</sup>; parietal lobe volume 12.6 cm<sup>3</sup>; deep gray matter volume 4.3 cm<sup>3</sup>; Alzheimer disease signature region volume 7.0 cm<sup>3</sup>; hippocampal volume 1.0 cm<sup>3</sup>.

Bolded data represents p<0.05 compared to no diabetes and HbA1c <5.7%

SUPPLEMENTARY DATA

**Supplementary Table 4.** Weighted Adjusted\* Cross-Sectional Associations of Pre-Diabetes/Diabetes/Fasting Glucose Categories with Brain MRI Parameters, ARIC Visit 5 (2011-2013), N=1639.

|                                                             | No Diabetes                        | Pre-Diabetes                            | Diabetes                           |                                    |
|-------------------------------------------------------------|------------------------------------|-----------------------------------------|------------------------------------|------------------------------------|
|                                                             | Fasting Glucose <100 mg/dl (n=427) | Fasting Glucose 100- <126 mg/dl (n=600) | Fasting Glucose <150 mg/dl (n=476) | Fasting Glucose ≥150 mg/dl (n=136) |
| Volumes†, β (95% CI)                                        |                                    |                                         |                                    |                                    |
| Total brain volume                                          | 0 (Reference)                      | -0.05 (-0.12, 0.01)                     | <b>-0.09 (-0.16, -0.02)</b>        | <b>-0.15 (-0.25, -0.04)</b>        |
| Frontal lobe volume                                         | 0 (Reference)                      | 0.02 (-0.06, 0.10)                      | -0.05 (-0.13, 0.04)                | -0.03 (-0.15, 0.09)                |
| Temporal lobe volume                                        | 0 (Reference)                      | -0.02 (-0.10, 0.06)                     | -0.05 (-0.14, 0.04)                | -0.09 (-0.22, 0.04)                |
| Occipital lobe volume                                       | 0 (Reference)                      | -0.02 (-0.13, 0.08)                     | -0.06 (-0.18, 0.05)                | -0.13 (-0.28, 0.02)                |
| Parietal lobe volume                                        | 0 (Reference)                      | 0.02 (-0.06, 0.10)                      | -0.03 (-0.12, 0.05)                | -0.02 (-0.13, 0.10)                |
| Deep gray matter volume                                     | 0 (Reference)                      | -0.03 (-0.15, 0.08)                     | -0.07 (-0.18, 0.05)                | <b>-0.32 (-0.49, -0.15)‡</b>       |
| Alzheimer disease signature region volume                   | 0 (Reference)                      | 0.00 (-0.09, 0.08)                      | -0.07 (-0.16, 0.02)                | -0.04 (-0.17, 0.09)                |
| Hippocampal volume                                          | 0 (Reference)                      | -0.06 (-0.17, 0.05)                     | -0.10 (-0.22, 0.02)                | <b>-0.27 (-0.45, -0.10)‡</b>       |
| Markers of Subclinical Cerebrovascular Disease, OR (95% CI) |                                    |                                         |                                    |                                    |
| Lobar microhemorrhages                                      | 1 (Reference)                      | 1.06 (0.63, 1.80)                       | 0.58 (0.31, 1.11)                  | 1.18 (0.59, 2.36)                  |
| Subcortical microhemorrhages                                | 1 (Reference)                      | 1.05 (0.71, 1.54)                       | 0.88 (0.58, 1.34)                  | 1.10 (0.64, 1.89)                  |
| Cortical Infarcts                                           | 1 (Reference)                      | 1.22 (0.70, 2.14)                       | 1.24 (0.69, 2.20)                  | 1.18 (0.52, 2.67)                  |
| Lacunar infarcts                                            | 1 (Reference)                      | 1.25 (0.82, 1.92)                       | 0.98 (0.62, 1.54)                  | 1.75 (0.93, 3.29)                  |
| Log <sub>2</sub> WMH volume†, β (95% CI)                    | 0 (Reference)                      | 0.10 (-0.08, 0.29)                      | 0.10 (-0.08, 0.28)                 | 0.10 (-0.14, 0.33)                 |

\*Model adjusted for age, sex, race/field center, education, smoking status, hypertension, cardiovascular disease, APOE ε4 genotype, and total intracranial volume (when outcome is volume).

†Standard deviation units. Definition of 1 standard deviation: total brain volume 108.1 cm<sup>3</sup>; frontal lobe volume 16.0 cm<sup>3</sup>; temporal lobe volume 11.7 cm<sup>3</sup>; occipital lobe volume 5.5 cm<sup>3</sup>; parietal lobe volume 12.6 cm<sup>3</sup>; deep gray matter volume 4.3 cm<sup>3</sup>; Alzheimer disease signature region volume 7.0 cm<sup>3</sup>; hippocampal volume 1.0 cm<sup>3</sup>.

Bolded data represents p<0.05 compared to no diabetes and fasting glucose <100 mg/dl.

‡P<0.05 for comparison of diabetes and fasting glucose ≥150 versus diabetes and fasting glucose <150 mg/dl.

SUPPLEMENTARY DATA

**Supplementary Table 5.** Weighted Participant Characteristics By Diabetes Duration Category Among those with Diabetes, ARIC Visit 5 (2011-2013), N=602.

|                                                | Diabetes Duration<br><10 Years<br>(n=342) | Diabetes Duration ≥10<br>Years<br>(n=260) | P-Value |
|------------------------------------------------|-------------------------------------------|-------------------------------------------|---------|
| Age (years), mean                              | 75.0                                      | 75.9                                      | 0.041   |
| Female, %                                      | 61.7                                      | 65.9                                      | 0.344   |
| Race/field center, %                           |                                           |                                           | 0.476   |
| Minneapolis, Minnesota whites                  | 26.0                                      | 21.2                                      |         |
| Washington County, Maryland whites             | 29.8                                      | 32.1                                      |         |
| Forsyth County, North Carolina whites          | 14.5                                      | 15.2                                      |         |
| Forsyth County, North Carolina blacks          | 1.7                                       | 4.3                                       |         |
| Jackson, Mississippi blacks                    | 28.1                                      | 27.1                                      |         |
| Education*, %                                  |                                           |                                           | 0.395   |
| < High school                                  | 15.7                                      | 20.2                                      |         |
| High school, GED, or vocational school         | 43.4                                      | 38.9                                      |         |
| College, graduate, or professional school      | 40.8                                      | 40.9                                      |         |
| Smoking status, %                              |                                           |                                           | 0.562   |
| Never                                          | 35.1                                      | 40.7                                      |         |
| Former                                         | 53.2                                      | 49.4                                      |         |
| Current                                        | 4.9                                       | 5.1                                       |         |
| Not reported                                   | 6.9                                       | 11.4                                      |         |
| Hypertension, %                                | 81.6                                      | 87.5                                      | 0.100   |
| Hyperlipidemia, %                              | 64.1                                      | 78.0                                      | 0.002   |
| History of cardiovascular disease, %           | 6.9                                       | 11.4                                      | 0.074   |
| Atrial fibrillation, %                         | 7.2                                       | 3.8                                       | 0.115   |
| HbA1c (%), mean                                | 6.3                                       | 6.9                                       | <0.001  |
| APOE ε4 Genotype, %                            |                                           |                                           | 0.638   |
| 0 APOE ε4 alleles                              | 73.9                                      | 71.9                                      |         |
| 1 or 2 APOE ε4 alleles                         | 26.1                                      | 28.1                                      |         |
| Volumes† (cm <sup>3</sup> ), mean              |                                           |                                           |         |
| Total brain volume                             | 1011.7                                    | 992.6                                     | <0.001  |
| Frontal lobe                                   | 148.8                                     | 147.7                                     | 0.015   |
| Temporal lobe                                  | 102.2                                     | 99.8                                      | <0.001  |
| Occipital lobe                                 | 40.3                                      | 39.6                                      | 0.006   |
| Parietal lobe                                  | 105.5                                     | 103.5                                     | <0.001  |
| Deep gray matter‡                              | 29.9                                      | 29.4                                      | 0.002   |
| Alzheimer disease signature region§            | 59.1                                      | 58.0                                      | 0.001   |
| Hippocampal                                    | 7.0                                       | 6.8                                       | <0.001  |
| Markers of Subclinical Cerebrovascular Disease |                                           |                                           |         |
| Lobar microhemorrhages, %                      | 6.1                                       | 6.6                                       | 0.810   |
| Subcortical microhemorrhages, %                | 17.2                                      | 17.8                                      | 0.868   |
| Cortical infarcts, %                           | 6.9                                       | 10.7                                      | 0.130   |
| Lacunar infarcts, %                            | 10.7                                      | 23.0                                      | <0.001  |
| WMH volume† (cm <sup>3</sup> ), median         | 9.8                                       | 12.2                                      | 0.021   |

## SUPPLEMENTARY DATA

\*Assessed at ARIC visit 1 (1987-1989).

†Adjusted for total intracranial volume.

‡Defined as thalamus + putamen + caudate + globus pallidus.

§Defined as hippocampus + parahippocampal + entorhinal + inferior parietal lobule + precuneus + cuneus.

||P-value represents t-test p-value for continuous variables and chi-square p-value for categorical variables.

Abbreviations: ARIC, Atherosclerosis Risk in Communities; GED, general education development; HbA1c, glycated hemoglobin; SD, standard deviation.

SUPPLEMENTARY DATA

**Supplementary Table 6.** Weighted Adjusted\* Cross-Sectional Associations of Diabetes Duration Categories with Brain MRI Parameters Among Those with Undiagnosed and Diagnosed Diabetes, ARIC Visit 5 (2011-2013), N=602.

|                                            | Undiagnosed Diabetes<br>(n=37) | Diagnosed Diabetes<br>Duration <10 Years<br>(n=305) | Diagnosed Diabetes<br>Duration ≥10 Years<br>(n=260) |
|--------------------------------------------|--------------------------------|-----------------------------------------------------|-----------------------------------------------------|
| Volumes†, β (95% CI)                       |                                |                                                     |                                                     |
| Total brain volume                         | 0 (Reference)                  | -0.11 (-0.26, 0.03)                                 | <b>-0.19 (-0.34, -0.05)</b>                         |
| Frontal lobe volume                        | 0 (Reference)                  | <b>-0.23 (-0.43, -0.03)</b>                         | <b>-0.22 (-0.43, -0.02)</b>                         |
| Temporal lobe volume                       | 0 (Reference)                  | -0.13 (-0.29, 0.04)                                 | <b>-0.22 (-0.39, -0.05)</b>                         |
| Occipital lobe volume                      | 0 (Reference)                  | 0.07 (-0.18, 0.32)                                  | 0.02 (-0.23, 0.27)                                  |
| Parietal lobe volume                       | 0 (Reference)                  | -0.15 (-0.34, 0.04)                                 | <b>-0.23 (-0.43, -0.04)</b>                         |
| Deep gray matter volume                    | 0 (Reference)                  | -0.07 (-0.42, 0.27)                                 | -0.11 (-0.46, 0.24)                                 |
| Alzheimer disease signature region volume  | 0 (Reference)                  | -0.15 (-0.34, 0.05)                                 | <b>-0.21 (-0.41, -0.01)</b>                         |
| Hippocampal volume                         | 0 (Reference)                  | -0.13 (-0.40, 0.13)                                 | -0.23 (-0.50, 0.03)                                 |
| Vascular Pathology, OR (95% CI)            |                                |                                                     |                                                     |
| Lobar microhemorrhages                     | 1 (Reference)                  | 1.08 (0.26, 4.47)                                   | 1.01 (0.25, 4.19)                                   |
| Subcortical microhemorrhages               | 1 (Reference)                  | <b>3.13 (1.11, 8.88)</b>                            | <b>3.11 (1.09, 8.88)</b>                            |
| Cortical Infarcts                          | 1 (Reference)                  | 0.93 (0.26, 3.36)                                   | 1.36 (0.38, 4.92)                                   |
| Lacunar infarcts                           | 1 (Reference)                  | 6.86 (0.84, 56.16)                                  | <b>13.42 (1.62, 111.39)</b>                         |
| log <sub>2</sub> (WMH volume)†, β (95% CI) | 0 (Reference)                  | 0.22 (-0.19, 0.62)                                  | 0.40 (-0.02, 0.82)                                  |

\*Model adjusted for age, sex, race/field center, education, smoking status, hypertension, cardiovascular disease, APOE ε4 genotype, and total intracranial volume (when outcome is volume).

†Standard deviation units. Definition of 1 standard deviation: total brain volume 108.1 cm<sup>3</sup>; frontal lobe volume 16.0 cm<sup>3</sup>; temporal lobe volume 11.7 cm<sup>3</sup>; occipital lobe volume 5.5 cm<sup>3</sup>; parietal lobe volume 12.6 cm<sup>3</sup>; deep gray matter volume 4.3 cm<sup>3</sup>; Alzheimer disease signature region volume 7.0 cm<sup>3</sup>; hippocampal volume 1.0 cm<sup>3</sup>.

Bolded data represents p<0.05.

SUPPLEMENTARY DATA

**Supplementary Figure 1.** Weighted Adjusted\* Restricted Cubic Spline Model Showing the  $\beta$ s (95% Confidence Intervals) for the Association of HbA1c with Total Brain Volume ( $\text{cm}^3$ ), ARIC Visit 5 (2011-2013), N=1713.

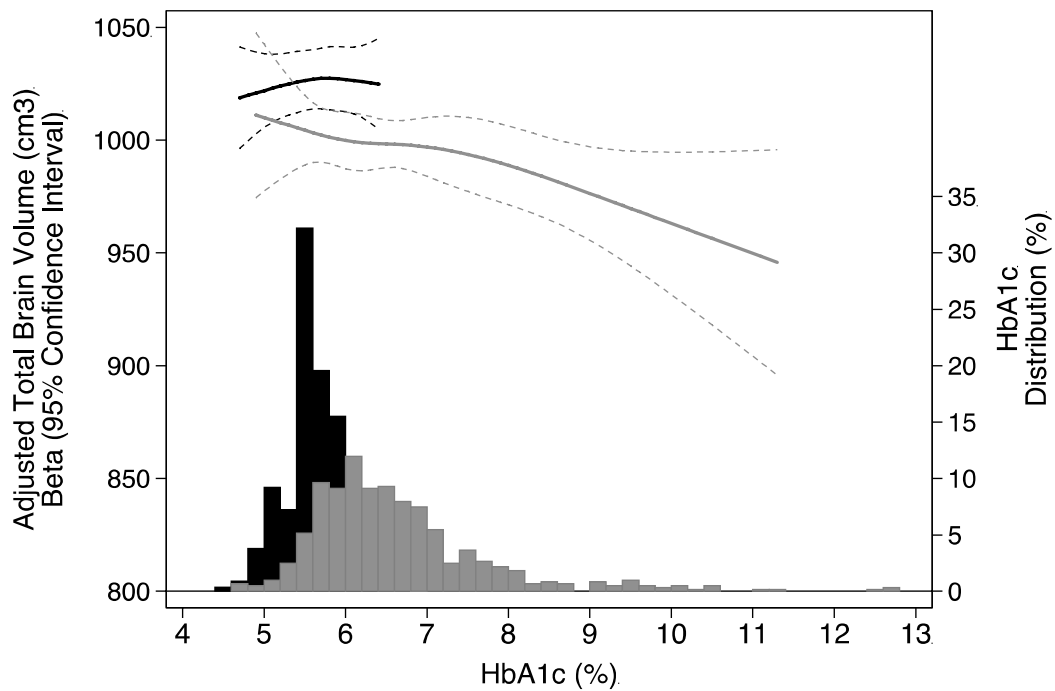

The solid lines represent the  $\beta$ s and the dashed lines represent the 95% confidence intervals. Knots are at 5<sup>th</sup>, 35<sup>th</sup>, 65<sup>th</sup>, and 95<sup>th</sup> percentiles. Restricted cubic splines are centered at the 10<sup>th</sup> percentile and truncated at 0.5<sup>th</sup> and 99.5<sup>th</sup> percentile of the HbA1c distribution. Histogram shows the distribution of concentrations of HbA1c.

\*Model adjusted for age, sex, race/field center, education, smoking status, hypertension, cardiovascular disease, APOE  $\epsilon$ 4 genotype, and total intracranial volume.
